# Supplementary material for: Ionic liquids to monitor the nano-structuration and the surface functionalization of material electrodes: a proof of concept applied to cobalt oxyhydroxide
Source: Royal Society of Chemistry journal article supplement (doi:10.1039/c9na00171a), 2019-01-01

## Supplemental Material

### Ionic liquids to monitor the nano-structuration and the surface functionalization of material electrodes: a proof of concept applied to cobalt oxyhydroxide

Jacob Olchowka\*,<sup>1,2</sup> Tiphaine Tailliez,<sup>1</sup> Lydie Bourgeois,<sup>3</sup> Marie Anne Dourges,<sup>3</sup>  
Liliane Guerlou-Demourgues\*<sup>1,2</sup>

<sup>1</sup> CNRS, Univ. Bordeaux, Bordeaux INP, ICMCB UMR 5026, F-33600 Pessac, France.

<sup>2</sup> RS2E, Réseau Français sur le Stockage Electrochimique de l'Energie, FR CNRS 3459, F-80039 Amiens Cedex 1, France.

<sup>3</sup> Institut des Sciences Molaires, Univ. Bordeaux, UMR 5255, F-33405 Talence, France

Corresponding Author: jacob.olchowka@icmcb.cnrs.fr

## Supplementary Information

S1. Representation of the ionic liquids and localization of the Carbon "C2" with an acidic hydrogen

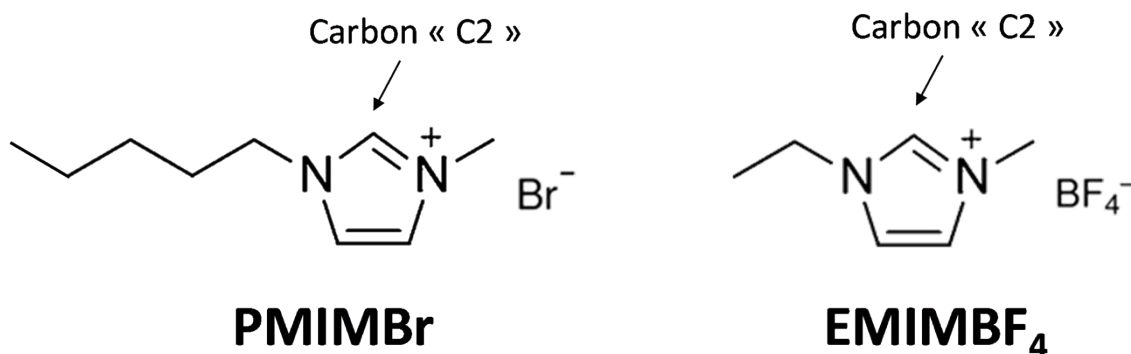

S2. Evolution of weight vs temperature during thermogravimetric analyses (TGA) of  $\text{HCoO}_2$ ,  $\text{HCoO}_2\text{-EMIMBF}_4$ ,  $\text{HCoO}_2\text{-PMIMBr}$  and of the pure ionic liquids for comparison sake.

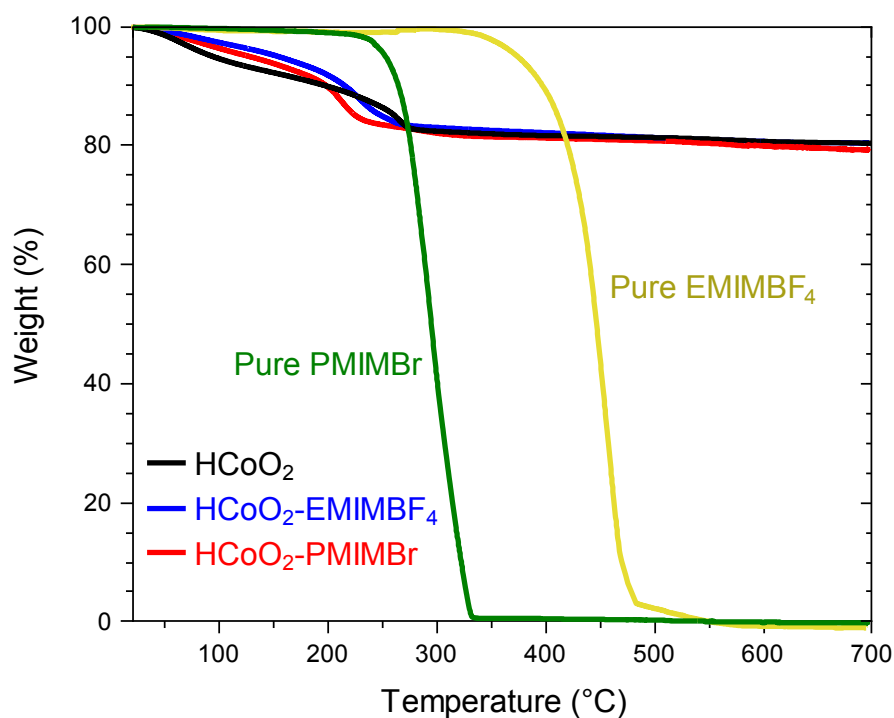

The TGA analyses show that the weight loss is calculated to be  $\sim 21\%$  for  $\text{HCoO}_2\text{-EMIMBF}_4$  and  $\text{HCoO}_2\text{-PMIMBr}$ , and  $20\%$  for  $\text{HCoO}_2$  at  $700^\circ\text{C}$ . This result reveals that the quantity of ionic liquid is very low, as expected with a surface functionalization.

S3. Cyclic voltammetry curves of  $\text{HCoO}_2$  in 5M-KOH at 5 mV/s

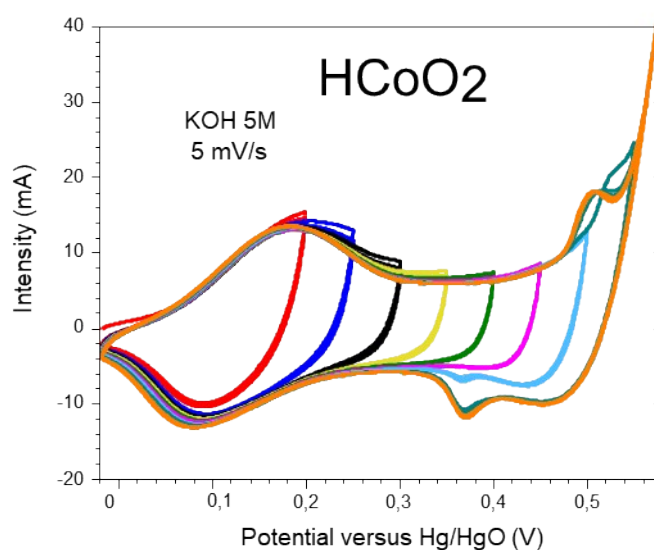

For  $\text{HCoO}_2$  electrode material, the second oxidation peak relative to the  $\text{Co(III)/Co(IV)}$  redox couple is centered around 0.51 V and is overlapped with the oxygen evolution peak.

S4. Equivalent circuit used for the fitting of the EIS data

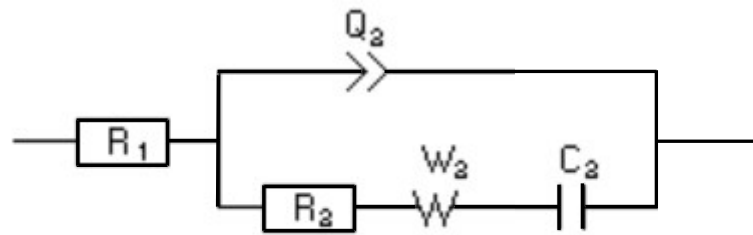

$R_1$  represents the bulk solution resistance,  $R_2$  represents the faradic charge transfer resistance across the electrode/electrolyte interface,  $W_2$  the Warburg element and  $C_2$  a capacitor whereas a double layer capacitance  $Q_2$  (Constant Phase Element) is connected parallel with  $R_2$ .

S5. Cyclic voltammetry curves at different scan rates: a)  $\text{HCoO}_2$  in 5M-KOH a)  $\text{HCoO}_2$  in 0.5M- $\text{K}_2\text{SO}_4$  c)  $\text{HCoO}_2\text{-EMIMBF}_4$  in 5M-KOH a)  $\text{HCoO}_2\text{-EMIMBF}_4$  in 0.5M- $\text{K}_2\text{SO}_4$  e)  $\text{HCoO}_2\text{-PMIMBr}$  in 5M-KOH f)  $\text{HCoO}_2\text{-PMIMBr}$  in 0.5M- $\text{K}_2\text{SO}_4$

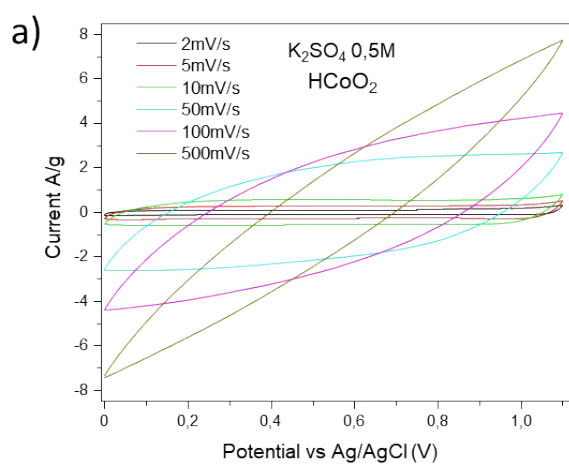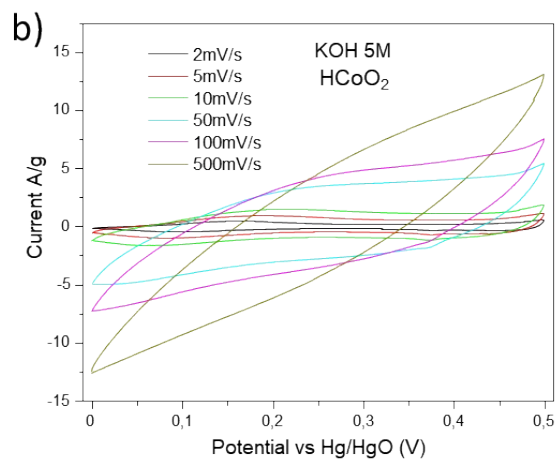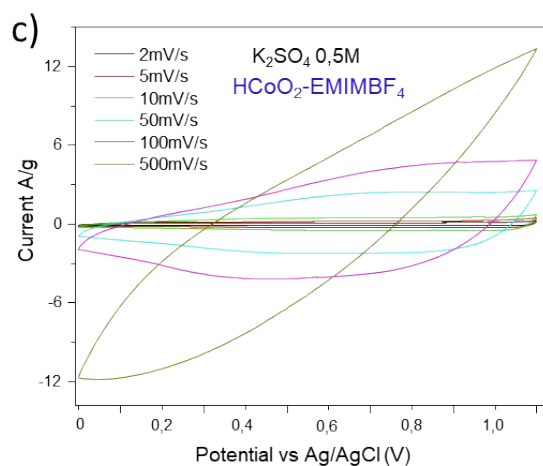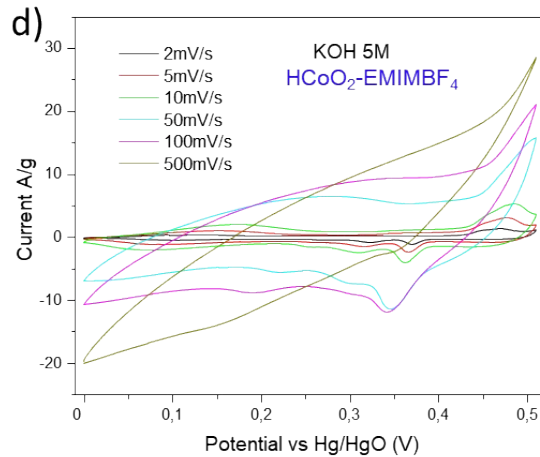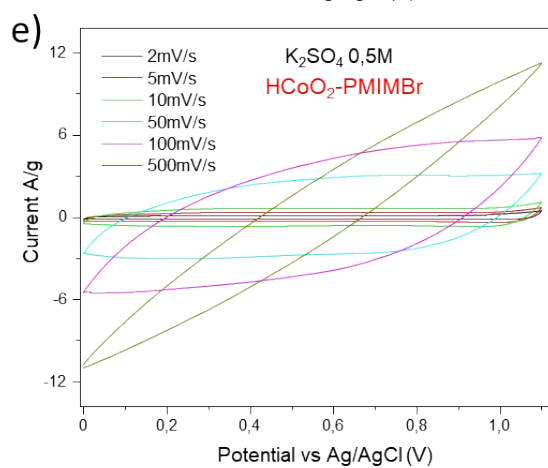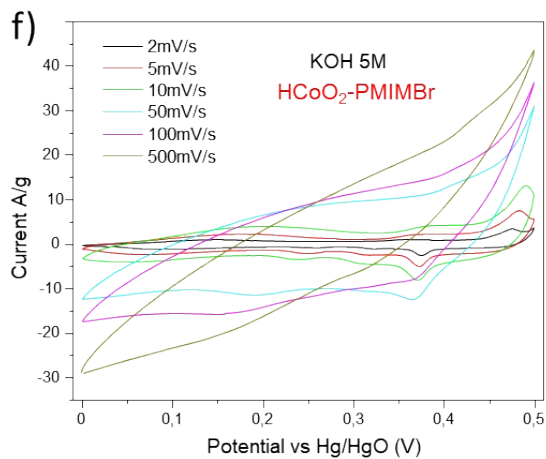

Supplement: c9na00171a1.pdf [file c9na00171a1.pdf]
